# Supplementary material for: [Retracted] Impacts of Ultrasound‐Guided Nerve Block Combined with General Anesthesia with Laryngeal Mask on the Patients with Lower Extremity Fractures
Source: Hindawi journal article supplement (doi:10.1155/2022/3603949), 2022-01-01
Supplement: f1 [file 3603949.f1.docx]

Supplementary table 1 Baseline data of the two groups

| Details | General anesthesia group (48) | Combined anesthesia group (42) | *Chi-square/t* | *P* |
| --- | --- | --- | --- | --- |
| Male/female | 28/20 | 25/17 | 0.01311 | 0.9088 |
| Age | 49.67 ± 3.21 | 50.32 ± 2.98 | 0.9908 | 0.3245 |
| Body mass (kg) | 58.5 ±2.3 | 57.8 ±2.6 | 1.355 | 0.1788 |
| ASA class I/II | 32/16 | 28/14 | 0.000 | >0.9999 |
| Operation time (min) | 72.28 ± 4.64 | 73.34 ± 5.14 | 1.028 | 0.3067 |
